1                   **Systematic comparison and rational design of theophylline**  
2                   **riboswitches for efficient gene repression**

3  
4  
5  
6

Xun Wang\*<sup>†</sup>, Can Fang<sup>†</sup>, Yifei Wang, Xinyu Shi, Fan Yu, Jin Xiong, Shan-Ho Chou & Jin He\*

7  
8

State Key Laboratory of Agricultural Microbiology, College of Life Science and Technology, Huazhong Agricultural University, Wuhan, Hubei 430070, P. R. China

9  
10

\*To whom correspondence should be addressed. Tel: +86 27 87280670; Fax: +86 27 87280670; Email: wangxun@mail.hzau.edu.cn (XW); [hejin@mail.hzau.edu.cn](mailto:hejin@mail.hzau.edu.cn) (JH)

11  
12

<sup>†</sup>The authors wish it to be known that, in their opinion, the first two authors should be regarded as Joint First Authors.

13  
14

**ABSTRACT**

15  
16  
17  
18  
19  
20  
21  
22  
23  
24  
25

Riboswitches are promising regulatory tools in synthetic biology. To date, 25 theophylline riboswitches have been developed for gene expression regulation in bacteria. However, no one has systematically evaluated their regulatory effects. To facilitate rational selection of theophylline riboswitches, we examined 25 theophylline riboswitches in *Escherichia coli* and surprised to find that none of the five repressive riboswitches were more than 2-fold effective. To solve this problem, we rationally designed a transcriptional repressive riboswitch and demonstrated its effect not only in various bacterial strains but also in different growth media or different temperatures. By introducing two copies of theophylline riboswitches and a RepA protein degradation tag coding sequence at the 5'-end of a reporter gene, we successfully constructed a dual gene expression regulatory system with up to 150-fold potency, namely the R2-RepA system. R2-RepA system is only 218 bp in length, expression of any protein could be repressed efficiently by simply inserting this system upstream of the

26 target protein-coding sequence. This study represented a crucial step toward harnessing theophylline  
27 riboswitches and expanding the synthetic biology toolbox.

## 28 INTRODUCTION

29 Riboswitches are common gene regulatory elements typically located in the 5'-untranslated region  
30 (UTR) of mRNAs that alter gene expression in response to small molecule ligands (Winkler *et al*,  
31 2002). It comprises two parts, an aptamer domain that binds ligand and an expression platform that  
32 regulates the expression of downstream genes (Breaker, 2012). Due to their simplicity, specificity,  
33 stability, modular design, and ease of implementation, riboswitches provide a promising platform for  
34 gene regulation.

35 To meet the growing demand, more than 60 artificial riboswitches that respond to non-metabolite  
36 ligands, including theophylline, tetracycline, naringenin, caprolactam and dopamine, have been  
37 constructed (Borujeni *et al*, 2016; Harbaugh *et al*, 2022; Jang *et al*, 2019; Jang *et al*, 2017; Suess *et al*,  
38 2004; Suess *et al*, 2003). Of these, theophylline riboswitch is the most studied (Wrist *et al*, 2020). In  
39 2004, Suess *et al*. engineered the first theophylline riboswitch by combining theophylline aptamer with  
40 an expression platform, resulting in a functional translational ON (TL-ON) riboswitch (Suess *et al*,  
41 2004). Shortly thereafter, Desai and Gallivan constructed another TL-ON theophylline riboswitch  
42 (Desai & Gallivan, 2004). Later, other researchers developed theophylline riboswitches with different  
43 regulatory mechanisms. For examples, Ogawa *et al*. fused theophylline aptamer to a hammerhead  
44 ribozyme to generate a ribozyme ON (RZ-ON) riboswitch (Ogawa & Maeda, 2008), and Fowler *et al*.  
45 selected the first transcriptional ON (TC-ON) theophylline riboswitch by fluorescence-activated cell  
46 sorting (FACS) technique (Fowler *et al*, 2008). Topp and Gallivan further constructed a translational  
47 OFF (TL-OFF) theophylline riboswitch by inserting a riboswitch coding sequence within the translated  
48 region of a gene (Topp & Gallivan, 2008). On top of that, Ceres *et al*. rational designed three chimeric  
49 riboswitches, each containing the same theophylline aptamer domain, with three independent  
50 expression platforms from *metE*, *yitJ* and *lysC* riboswitches to generate three functional transcriptional  
51 OFF (TC-OFF) riboswitches (Ceres *et al*, 2013a). Meanwhile, various research teams have extensively  
52 screened and optimized the theophylline riboswitch library to improve their regulatory ability. In order

53 to accurately characterize the regulatory ability of riboswitches, researchers introduced  
54 activation/inhibition ratio, which refers to the quantitative relationship between small molecule inducer  
55 concentration and biosensor output signal (Snoek *et al*, 2020). The activation/repression ratio is  
56 calculated as the fold change between the maximum and minimum values of biosensor output signal.  
57 For example, Topp *et al*. screened and constructed six TL-ON theophylline riboswitches termed A-E  
58 and E\*, which enable inducible gene expression in eight different bacterial species with activation  
59 ranging from 5 to 150-fold (Topp *et al*, 2011). Cui *et al*. modified the ribosome binding site (RBS) in  
60 riboswitch E to generate riboswitch E1 that results in an activation fold of 6.8 in *Bacillus subtilis* (Cui  
61 *et al*, 2016). After that, Canadas *et al*. generated four riboswitches based on the sequence of riboswitch  
62 E\*, providing effective activation in *Clostridium* (Canadas *et al*, 2019). Details of the above  
63 riboswitches are shown in [Table 1](#).

64 From the above, it can be concluded that theophylline riboswitches have been developed for five  
65 distinct regulatory mechanisms that can mediate two different regulatory effects: activation or  
66 repression of gene expression. While many studies have assessed the activation/repression ratios of  
67 these riboswitches under various conditions, systematic comparisons of their regulatory functions  
68 under the same experimental condition are lacking. To facilitate a more rational selection of  
69 theophylline riboswitches, we focused on two important parameters, the activation/repression ratio and  
70 the basal expression level. The latter is the output signal of the biosensor in the absence of the inducer  
71 (Rogers *et al*, 2015). We examined 25 theophylline riboswitches commonly used in bacterial cells,  
72 including 17 TL-ON, 3 TC-ON, 1 RZ-ON, 1 TL-OFF, and 3 TC-OFF riboswitches. We investigated  
73 these two parameters in *Escherichia coli* MG1655 strain and found that they were highly variable. We  
74 also compared the data in different *E. coli* strains, growth media, and temperatures, and found, notably,  
75 that the regulatory effects of riboswitches were unsatisfactory except for TL-ON riboswitches. To  
76 obtain an efficient repressive riboswitch, we rationally designed and constructed a novel TC-OFF  
77 theophylline riboswitch. To further enhance the effect, we employed two strategies: first, we connected  
78 riboswitches in tandem to increase their activation/repression ratios; second, we exploited a protein  
79 degradation tag to shorten the half-life of the proteins, thereby achieving extremely low protein leaky  
80 expression. We also constructed a mathematical model to predict the systemic repression effects at

81 different theophylline concentrations. This work thus provided a new biological cassette for bottom-up  
82 design of genetic circuits that shall greatly facilitate rational engineering of gene expression in  
83 synthetic and systems biology.

## 84 MATERIAL AND METHODS

### 85 Plasmid construction

86 In *E. coli* and *S. Typhimurium*, reporter plasmids were constructed using pBRplac as the parent  
87 plasmid (Beisel & Storz, 2011; Guillier & Gottesman, 2006). In *M. smegmatis*, *B. thuringiensis* and *B.*  
88 *subtilis*, plasmids pMV261 (Ali *et al*, 2017; Li *et al*, 2022), pRP0122 (Zhou *et al*, 2016) and pHT43  
89 (Rafique *et al*, 2021) were used respectively. Except for pHT43, the transcription of *turborfp* along  
90 with its 5'UTR regulatory elements was carried out under strong constitutive promoters. In pHT43,  
91 gene expression was controlled by the strong IPTG-inducible P<sub>grac</sub> promoter. The primers used for  
92 plasmid construction were synthesized by Tianyi Huiyuan (Wuhan, Hubei, China). All plasmids  
93 generated in this study were assembled using the Hieff Clone®Plus Multi One Step Cloning Kit  
94 (YEASEN, Shanghai, China), and confirmed *via* sequencing (Quintarabio, Wuhan, Hubei, China). The  
95 constructed plasmids were transformed into corresponding strains via calcium chloride (CaCl<sub>2</sub>) method  
96 to produce corresponding derivative strains ([Supplementary Table S1](#)). The plasmids and primers used  
97 in this study were listed in [Appendix Table S2 and S3](#).

### 98 Bacteria and culture conditions

99 *E. coli* DH5 $\alpha$  was used for all cloning experiments. If not indicated otherwise, *E. coli* MG1655  
100 was transformed with the resulting plasmids for fluorescence measurement. *E. coli* NST74 (Tribe,  
101 1987), BL21, HB101, JM101, BW25113 and Top10, *Salmonella enterica* serovar Typhimurium  
102 SL1344 (Richardson *et al*, 2011), *Mycobacteria smegmatis* MC<sup>2</sup>155 (Li *et al*, 2017), *Bacillus*  
103 *thuringiensis* BMB171 (He *et al*, 2010; Wang *et al*, 2019) and *Bacillus subtilis* 168 were employed as  
104 hosts for riboswitch performance tests ([Appendix Table S1](#)). *E. coli*, *S. Typhimurium* and *B.*  
105 *thuringiensis* were grown in lysogeny broth (LB) medium (tryptone 10 g/L; yeast extract 5 g/L; NaCl  
106 10 g/L), and *M. smegmatis* in 7H9 media (7H9 Broth 4.9 g/L; 0.2% glycerol; Tween 20 0.05%). For *B.*  
107 *subtilis*, 2 $\times$ yeast extract tryptone (2 $\times$ YT) medium (tryptone 16 g/L; yeast extract 10 g/L; NaCl 5 g/L)

108 were used for cultivation. When necessary, ampicillin, kanamycin and spectinomycin was added to the  
109 culture at the final concentrations of 100  $\mu\text{g}/\text{mL}$ , 50  $\mu\text{g}/\text{mL}$ , and 100  $\mu\text{g}/\text{mL}$ , respectively. If not  
110 otherwise indicated, strains were grown in 250 mL shake flasks (50 mL medium per flask) on a rotary  
111 shaker at 200 rpm at 37 °C (Ruihua, Wuhan, Hubei, China).

112 For fluorescence measurement, individual colonies were picked and grown overnight in 5 mL LB  
113 media with 100  $\mu\text{g}/\text{mL}$  ampicillin. This culture was diluted 100-fold to inoculate 50 mL of fresh media  
114 and allowed to grow to early exponential phase (2 hours after inoculation, an  $\text{OD}_{600}$  approximately 0.5),  
115 at which point theophylline was added to the media at the concentrations indicated. Cells were allowed  
116 to grow at 37 °C for different times to measure their fluorescence intensity as indicated in the figure  
117 legend.

#### 118 **RNA extraction, cDNA synthesis, and RT-qPCR.**

119 For RT-qPCR experiments, 2 mL samples from *E. coli* strains were collected. Total RNA was  
120 extracted, and RT-qPCR was conducted essentially as previously described (Wang *et al*, 2014), with  
121 modifications as indicated in the figure legends. Results for each strain were normalized to those of the  
122 *rrsB* gene coding 16S rRNA. For data analysis, technical and biological triplet data were obtained.  
123 Data were subjected to one-way analysis of variance (ANOVA) using the Bonferroni test,  $n = 3$ .

#### 124 **Fluorescence measurement**

125 Samples were taken in triplicate (1 mL each sample), and  $\text{OD}_{600}$  was measured using 500  $\mu\text{L}$  of  
126 culture. Another 500  $\mu\text{L}$  of the culture was taken and diluted to appropriate concentration with LB  
127 media to measure its fluorescence intensity in a 96 well microplate (Sangon Biotech, Shanghai, China).  
128 Fluorescent measurements were carried out at an excitation wavelength of 553 nm, and the emission  
129 fluorescence was taken at 593 nm. All fluorescence intensity results were normalized by respective cell  
130 growth ( $\text{OD}_{600}$ ) and background elimination. All experimental results were obtained with three  
131 biological replicates. Data were subjected to one-way analysis of variance (ANOVA) using the  
132 Bonferroni test,  $n = 3$ .

#### 133 **Mathematical model**

134 The model was generated in MATLAB R2019b. The equations used were based on the law of  
135 mass action that describes the biomolecular interactions. A detailed derivation and description of the  
136 model was provided in the results section and in the Appendix file (Koch, 1956; Quand *et al*, 2013).

## 137 **RESULTS**

### 138 **Systematic evaluation of theophylline riboswitches**

139 To test the regulatory role of each riboswitch, we first determined the applied host strain, culture  
140 conditions, and appropriate inducer concentrations. We selected the most representative "wild type" *E.*  
141 *coli* strain MG1655, and the corresponding LB medium, incubated it at 37 °C. We then examined the  
142 inhibitory effect of theophylline on the growth of MG1655 and found that the growth inhibition in LB  
143 medium was negligible when theophylline concentration was less than 2 mM ([Appendix Fig S1](#)).  
144 Therefore, 2 mM theophylline was used in all following experiments unless otherwise indicated. We  
145 compiled the detailed sequences of 25 theophylline riboswitches commonly used in bacteria by  
146 reviewing the literature and classified them into 17 TL-ON, 3 TC-ON, 1 RZ-ON, 1 TL-OFF, and 3  
147 TC-OFF riboswitches according to their regulatory mechanisms and effects ([Tables 1](#)). We then  
148 separately inserted coding sequences of different theophylline riboswitches upstream of the reporter  
149 gene *turbofnp* controlled by a constitutive promoter ([Fig 1A](#)) to construct 25 different plasmids  
150 containing theophylline riboswitches ([Appendix Table S2](#)). We also constructed the pWA143 plasmid  
151 containing the gene circuit but without the riboswitch coding sequence as a negative control ([Fig 1A](#)).  
152 We then transformed these plasmids individually into MG1655 to test the function of different  
153 theophylline riboswitches.

154 To evaluate these riboswitches, we examined their performance on activation/repression ratios and  
155 basal expression levels. Activation/repression ratio was calculated by dividing the TurboRFP  
156 fluorescence intensity at 2 mM theophylline by the fluorescence intensity at 0 mM theophylline. Basal  
157 expression levels refer to TurboRFP fluorescence intensity at 0 mM theophylline. These two  
158 parameters together constitute the dynamic range of the riboswitch, that is, the maximum and minimum  
159 values that it can regulate ([Fig 1B](#)).

160 First, we focused on the activation/repression ratios of these riboswitches (Fig 1C). Most 17  
161 TL-ON riboswitches showed 2.2- to 63-fold activation; unfortunately, No. 1 and No. 21 exhibited less  
162 than 2-fold activation, and No. 19 had almost no fluorescent signal. Of the 3 TC-ON riboswitches, No.  
163 5 and No. 14 promoted more than 2-fold expression of TurboRFP in the presence of theophylline,  
164 while No. 18 showed the opposite effect under our experimental condition; it did not activate, but  
165 inhibited gene expression. For No. 4 riboswitch of RZ-ON, the data showed that it barely worked. It  
166 can be seen that of the above 21 ON-switches, including 17 TL-ON, 3 TC-ON and 1 RZ-ON, No. 13  
167 exhibited the highest activation ratio of 63.6-fold. Of the 4 OFF-switches, No. 3 riboswitch was  
168 reported to repress translation, but was only 1.1-fold effective when grown in the presence of  
169 theophylline. Three TC-OFF riboswitches (No. 15, No. 16, and No. 17) were also tested. Only No. 17  
170 showed a 1.6-fold difference in repressing gene expression, and the other two had almost unchanged  
171 TurboRFP fluorescence intensities under theophylline induction.

172 Next, we compared basal expression levels and found that they varied widely (Fig 1C). Among  
173 the "ON" riboswitches, the relative basal levels of TurboRFP fluorescence expression ranged from as  
174 low as 2.5 arbitrary units (a.u.) (No. 11) to as high as 23,000 a.u. (No. 21), meaning that they differ by  
175 a factor of almost 10,000. In the "OFF" riboswitches, there is also a large difference in the basal  
176 expression levels of TurboRFP. For example, the highest (No. 17) and the lowest (No. 3) were 1,300  
177 a.u. and 15 a.u., respectively. Given the limited activation/repression ratio of most riboswitches, these  
178 differences cannot be ignored. For example, if two riboswitches both activated gene expression up to  
179 10-fold, and if one has a basal expression level of 100 a.u. and the other of 1000 a.u., then they  
180 regulated with a dynamic range of 100-1,000 a.u., and 1,000-10,000 a.u., respectively, which could  
181 lead to a large difference in gene expression. That said, when we focused on the activation/repression  
182 ratios of riboswitches, we should also pay attention to their basal expression levels.

183 Finally, we tested the performance of the aforementioned 25 riboswitches under different  
184 conditions, including different *E. coli* strains, different temperatures, and different media. Although the  
185 degrees of activation/repression have changed, it is worth noting that for most riboswitches, dynamic  
186 range didn't change much. For example, for TL-ON riboswitch No. 6, in strain JM101, the activation

187 ratio in LB medium at 37 °C was only 1.1, but in strain DH5a, it reached 9.6 in LB medium at 25 °C.  
188 Although far different, the relative TurboRFP fluorescence intensities were still in the dynamic range  
189 of 100-300 a.u. This was also true for other riboswitches, such as TL-ON riboswitch No. 21, where the  
190 dynamic range was consistently within 20,000-40,000 a.u., regardless of the conditions. Therefore,  
191 testing riboswitches under various conditions allowed us to more accurately assess their functions.

192 Notably, TL-ON riboswitches No. 13 showed superior results, with activation ratio exceeding 12  
193 under all tested conditions. Its basal expression ratios fluctuated in the range of 3-76 a.u. ([Appendix Fig](#)  
194 [S2](#)). Therefore, this riboswitch was the best player of all ON-riboswitches. On the contrary, all  
195 OFF-riboswitches performed poorly, with repression ratio less than 2-fold. For TC-OFF riboswitch No.  
196 17, previous results showed that its repression ratio was 1.6 at 2 mM theophylline than at 0 mM  
197 theophylline, and was ineffective at 25°C and in SOC medium.

198 From the above data, we could conclude that among the 5 regulatory mechanisms, TL-ON  
199 riboswitches were the best optimized, especially riboswitches No. 13, because it showed the highest  
200 activation ratio and the lowest basal expression level. However, none of the "OFF" riboswitches  
201 showed over 2-fold repression ratio, so we needed to redesign and reconstruct a repressive riboswitch.

## 202 **Rational design of TC-OFF theophylline riboswitch**

203 Among the riboswitches for transcriptional regulation, there are two types of regulation based on  
204 intrinsic terminators and those based on Rho-dependent terminators (Proshkin *et al.*, 2014; Wang *et al.*,  
205 2019). Intrinsic terminators are sequences in the non-template DNA strand that, when transcribed into  
206 RNA, forms a GC-rich hairpin structure followed by a U-rich tract in the RNA:DNA hybrid  
207 (Rosenberg & Court, 1979). It leads to dissociation of elongation complex without the assistance of  
208 auxiliary transcription regulators. Compared to translational and ribozyme-based regulation,  
209 transcriptional control by intrinsic termination is a more conserved, relatively simple, and efficient  
210 regulatory mechanism (Mitra *et al.*, 2009). Considering the advantages of intrinsic terminator-based  
211 transcriptional control, we sought to develop a TC-OFF theophylline riboswitch. Riboswitch B (No. 9  
212 in this work) was previously reported to activate protein translation (Topp *et al.*, 2011). In the absence  
213 of theophylline, riboswitch B folds into an OFF state in which the RBS was sequestered in the



214 secondary structure. When theophylline binds to the aptamer, RBS becomes accessible to 16S rRNA of  
215 the ribosome to initiate translation (Topp *et al.*, 2011). Interestingly, we found that the RBS sequence  
216 “AGGGGGU” is rich in G, which represents exactly half of the intrinsic transcription terminator  
217 hairpin sequence. We speculated that if the downstream sequence of RBS was replaced by another half  
218 of the terminator, a complete intrinsic transcription terminator could be constructed. Therefore, we  
219 changed the sequence “CAAGAUG” to “CCCCCUU” and added another 7 U residues (UUUUUUU)  
220 downstream of it. The terminator is thus composed of a 7 bp hairpin stem, a 4 bp loop, and a stretch of  
221 8 U residues (Fig 2A). We named this new riboswitch R1 and expected it to transcriptionally repress  
222 expression. Since the translation initiation codon AUG in riboswitch B was deleted in the new  
223 construct, we added an RBS and an AUG codon downstream of the riboswitch to initiate TurboRFP  
224 translation. The corresponding plasmid was named pWA131 (Appendix Fig S3, Table S2).

225 To test whether R1 is functional *in vivo*, MG1655-pWA131 (test strain) or MG1655-pWA143  
226 (control strain) were grown in LB supplemented with 100 µg/mL ampicillin for 2 hours to reach early  
227 exponential phase. Theophylline was then added at 2 hours, and *turborfp* mRNA amount or  
228 fluorescence density was measured at 2, 4, and 6 hours. The results showed that the expression of  
229 *turborfp* mRNA in test strain decreased by 2.1- and 2.8-fold at 4 and 6 hours after the addition of  
230 theophylline compared to the case where no theophylline was added. Meanwhile, control strain showed  
231 no significant changes in mRNA amount whether theophylline is present or not (Fig 2B). The trends in  
232 TurboRFP fluorescence intensities of the test or control strains were consistent with the changes in  
233 mRNA amounts. After adding theophylline, the TurboRFP fluorescence intensities decreased by 1.2-  
234 and 2.0-fold at 4 and 6 hours in the test strain, respectively, compared with the strains without  
235 theophylline addition (Fig 2C). Likewise, the TurboRFP fluorescence intensities of the control strain  
236 with or without theophylline did not change significantly (Fig 2C). The addition of theophylline thus  
237 resulted in a decrease in mRNA and protein levels, demonstrating that our construction of the TC-OFF  
238 theophylline riboswitch was indeed working.

### 239 **Improvement of riboswitch performance**

240           However, we noticed that the repression ratio of the riboswitch was not large enough. To address  
241 this issue, we found previous literature showing that riboswitches in tandem could achieve a greater  
242 repression ratio and reduce leaky expression (Sudarsan *et al*, 2006; Zhou *et al.*, 2016). Therefore, we  
243 integrated two or three theophylline riboswitches coding sequences linked by a 13 bp linker sequence  
244 upstream of *turborfp*, to generate plasmids of pWA140 (R2) and pWA141 (R3), respectively (Fig 3A).  
245 Detailed sequences and derivative strains are listed in Appendix Fig S3 and Table S1. At 4 hours, R2  
246 and R3 repressed TurboRFP expression by 1.4- and 1.5-fold in the presence of theophylline. And at 6  
247 hours, these values increased to 3.7- and 2.8-folds, respectively (Fig 3B). From the above data, it can  
248 be seen that R2 gave the highest repression ratio among the three at 6 hours. We also found that  
249 increasing the number of riboswitches in tandem reduced the basal expression level from 61,830 a.u.  
250 (R1) to 39,143 a.u. (R2) to 17,611 a.u. (R3) at 6 hours. After theophylline addition, the corresponding  
251 TurboRFP fluorescence intensities also decreased from 31,161 a.u. (R1) to 10,559 a.u. (R2) to 6,395  
252 a.u. (R3).

253           The response of tandem riboswitches to different concentrations of theophylline was also tested.  
254 We measured the fluorescence intensities 6 hours after adding 0, 0.5, 1.0, and 2 mM theophylline. The  
255 slopes of the linear regression lines of R1 and R2 were -1.433 and -1.309, respectively, indicating that  
256 R1 and R2 showed similar theophylline responses. However, R3 was less sensitive to changes in  
257 theophylline concentration, with a slope of the linear regression line of -0.4869 (Fig 3C). Taking into  
258 account the repression ratio and basal expression level, we concluded that R2 performed the best  
259 among the three.

## 260 **Mathematical model of R2-mediated quantifiable repression**

261           To validate our observations and provide predictability, we constructed a mathematic model of the  
262 regulatory effect of R2 to different concentrations of theophylline at different times (Fig 4A). As the  
263 simulations showed, our model agreed well with the experiment results (R-square was 0.9755). The  
264 effect of riboswitch changed greatly when theophylline concentration was below 0.25 mM, and  
265 effective repression occurred when theophylline concentration was higher than 0.25 mM. The highest  
266 level of repression was reached at 8 hours. Therefore, based on the simulations, we could calculate the

267 fluorescence levels in the theophylline concentration range and time range. Conversely, if the  
268 theophylline concentration in the media is unknown, we could deduce the concentration of theophylline  
269 in the media from the TurboRFP fluorescence density.

#### 270 **Robustness of R2 under various conditions**

271 To investigate the robustness of R2, we tested it in five different bacteria, including  
272 *Proteobacteria E. coli* BL21 and *S. Typhimurium* SL1344, *Actinobacteria M. smegmatis* MC<sup>2</sup>155,  
273 *Firmicutes B. subtilis* 168 and *B. thuringiensis* BMB171, which are widely used in genetic engineering.  
274 In most strains, R2 provided more than 7-fold repression (Fig 5A). Different *E. coli* stains, including  
275 BL21, JM101, HB101, NST74, BW25113, Top10 and DH5 $\alpha$ , were also tested. In all strains, the  
276 presence of R2 did show a significant repression effect. Among them, JM101 provided the highest  
277 repression ratio (Fig 5B).

278 Since temperature plays an important role in the structure and function of riboswitch RNAs  
279 (Fuertig *et al*, 2020), we selected the JM101 strain with the best regulatory effect for testing. R2 in  
280 JM101 was tested at 5 different temperatures ranging from 16 °C to 42 °C. Indeed, R2 exhibited  
281 significant inhibition at all temperatures tested, but was more potent at 42°C than at 16°C with a factor  
282 of 77.4 and 4.9 (Fig 5C). We attributed this phenomenon to a higher mobility of RNA structure at high  
283 temperature (Wu *et al*, 2021).

284 R2 activity was also measured by changing growth media, and found to exhibit good regulatory  
285 performance in all tested media except SOC (Fig 5D). Less reduction of TurboRFP was detected when  
286 cultured in SOC. By carefully examining the composition of the media, we speculated that glucose in  
287 the SOC might prevent its function. To test this hypothesis, we added 0.4% glucose to the LB medium  
288 and subsequently measured its fluorescence. As expected, R2 was inactive in this medium. These data  
289 suggested a certain correlation between glucose concentration and theophylline transport. Since little is  
290 known about theophylline transport in *E. coli*, our results provided some clues for this study. In  
291 conclusion, our rationally designed TC-OFF theophylline riboswitch could control gene expression  
292 under a variety of bacteria, different growth media and temperatures, making it a useful tool for  
293 repressing gene expression.

294 **Enhanced repression by the dual transcription-translation control system R2-RepA**

295 Through the above experiments, we found that although R2 had superior regulatory effect in *E.*  
296 *coli* JM101, up to 77.4-fold, the repression in the widely used ‘wild-type’ MG1655 strain was not ideal,  
297 only 10-fold at the maximum level of repression of 24 hours. To further reduce the leaky expression in  
298 MG1655, we introduced a second gene repression element into the system: a protein degradation tag  
299 (RepA), which consists of 15 amino acids (NQSFISDILYADIES) that directs the target protein to the  
300 housekeeping ClpAP protease (Butz *et al*, 2011; Hoskins *et al*, 2000). This element can be used to  
301 shorten the half-life of proteins, thereby reducing leaky expression. We considered it to be a promising  
302 regulatory tool because it is located at the N-terminus of the protein, so the RepA tag coding sequence  
303 could be easily integrated with the riboswitch coding sequence as a single regulatory cassette. We  
304 anticipated that the fusion protein called RepA-RFP could serve as a substrate for ClpAP degradation  
305 (Fig 6A), with the detailed sequences listed in Appendix Fig S3. The repression ability of the RepA tag  
306 was examined from 2 to 12 hours. As shown in Fig 6B, TurboRFP fluorescence intensities were indeed  
307 reduced in RepA-RFP (RepA, MG1655-pWA144) compared to untagged TurboRFP (no riboswitch,  
308 MG1655-pWA143), but leaky expression was still seen throughout growth. The lowest expression of  
309 RepA-RFP was at 6 hours, and the fluorescence gradually accumulated from 8 hours to 12 hours. One  
310 possible reason is that at stationary phase, the amount of proteins targeted for degradation by proteases  
311 increased, and they competed for a limited number of proteases, leading to a prolonged half-life of  
312 RepA-RFP (Zhou & Gottesman, 1998). We also tested the repression of TurboRFP by R2 from 2 to 12  
313 hours. In the absence of theophylline, TurboRFP fluorescence intensities increased over time. After the  
314 addition of theophylline, they decreased from 1.4-fold at 4 hours to 6.5-fold at 12 hours (R2,  
315 MG1655-pWA140) (Fig 6C). However, the results showed that there was still significant leaky  
316 expression from 6 to 12 hours. Thus, we could see that neither RepA nor riboswitch alone could  
317 effectively inhibit gene expression.

318 Next, the R2-RepA system, in which two theophylline riboswitch coding sequences in tandem  
319 were fused to the RepA coding sequence, was inserted upstream of *turboRfp* (pWA146) (Fig 6A and  
320 Appendix Fig S3). We then measured the regulatory effect of R2-RepA system in media with or  
321 without theophylline. The strain produced nearly no fluorescence in the presence of theophylline (99

322 a. u.), highlighting the high repression efficiency of R2-RepA system (Fig 6D). As with R2-RepA  
323 system (R2-RepA, MG1655-pWA146), the maximum level of repression at 12 hours after addition of  
324 theophylline reached 151.2-fold compared to the system without the repression (no riboswitch,  
325 MG1655-pWA143). In another word, at 12 hours after adding theophylline, basal expression was  
326 particularly low, only 0.6% of TurboRFP alone. Our results supported the idea that the R2-RepA  
327 system is very effective in repressing gene expression.

## 328 **DISCUSSION**

### 329 **A highly efficient dual gene expression regulatory system**

330 We have successfully generated a new theophylline riboswitch that repress transcription on  
331 binding of theophylline. By combining transcriptional and translational regulation, we constructed a  
332 dual gene expression regulatory system based on riboswitches and protein degradation tag RepA,  
333 namely the R2-RepA system. The R2-RepA system is only 218 bp in length, and did not require  
334 additional expression of other regulatory proteins. The expression of any protein could now be  
335 repressed efficiently by simply inserting this new cassette upstream of the protein-coding sequence,  
336 followed by adding theophylline to achieve over 150-fold of gene repression. In addition, we  
337 systematically evaluated 25 theophylline riboswitches used in bacteria. We determined their  
338 activation/repression ratios and basal expression levels in various strains, growth media and  
339 temperatures. Therefore, these works provide the basis for a more rational selection of theophylline  
340 riboswitches.

### 341 **Possible reasons for the poor performances of theophylline riboswitches**

342 In Appendix Table S4, we described in more detail than Table 1 all theophylline riboswitches  
343 developed in bacteria to date. We compiled information on sequences, lengths, regulatory mechanisms,  
344 growth conditions, construction methods, and activation/repression ratios, and tried to identify the  
345 causes of those riboswitches with poor performance (activation/repression ratio less than 2-fold), such  
346 as riboswitches No. 1, No. 3, No. 4, No. 15, No. 16, No. 17, No. 18 and No. 21. We first evaluated their  
347 full-length riboswitch structures by RNAfold (Gruber *et al*, 2008), and found that, of these  
348 riboswitches, the secondary structures of the two TL-ON riboswitches No. 1 and No. 21 were the most

349 unstable, with a minimum free energy (MFE) of only -0.13 and -0.11 kcal/mol/bp, respectively. This  
350 means that, in the absence of theophylline, the RBS and start codon tended to be accessible for  
351 translation initiation, resulting in significant leaky expression. We also compared the structural  
352 differences between the full-length riboswitches and those with aptamer region only that were  
353 constrained to form efficient ligand-binding folds. TL-OFF riboswitch No. 3, RZ-ON riboswitch No. 4,  
354 TC-OFF riboswitch No. 15, No. 16 and No. 17 showed no secondary structure changes in either state.  
355 Therefore, we speculated that theophylline has little effect on maintaining the theophylline-binding  
356 secondary structure of these RNAs, resulting in no regulatory effect. We also calculated the free energy  
357 differences between theophylline-bound and theophylline-unbound state of these riboswitches. The free  
358 energy difference for No. 18 was -22.6, deviated significantly from the binding energy of the  
359 aptamer/theophylline complex (-8.86 kcal/mol) (Wachsmuth *et al*, 2013). Thus, this RNA did not  
360 appear to fold as the authors claimed.

### 361 **Applications of the dual transcription-translation control system R2-RepA**

362 Compared to the numerous strategies to achieve high gene expression levels in *E. coli*, relatively  
363 few repression systems were available (Bervoets & Charlier, 2019; Kato, 2020). To date, three systems  
364 are commonly used in bacterial cells; the tetracycline-repression system (Tet-off system), clustered  
365 regularly interspaced short palindromic repeats interference (CRISPRi), and sRNA mediated gene  
366 repression. While useful in a large number of applications, these systems have limitations. The Tet-off  
367 system and the CRISPRi system require additional expression of the regulatory proteins TetR and Cas,  
368 which increase the manipulation difficulty and metabolic burden for bacteria (Hillen & Berens, 1994;  
369 Qi *et al*, 2013). Compared with these three repression systems, the current R2-RepA system had  
370 several advantages: 1) No additional protein expression is required; 2) The R2-RepA system is very  
371 short, only 218 bp in length; 3) There is less crosstalk between inducer and cellular metabolism (Yu *et*  
372 *al*, 2009); 4) The system is very effective, with up to 150-fold repression. Therefore, our system is  
373 simple, accurate and can be used as a general approach for repressing gene expression.

374 However, the R2-RepA system also had certain limitations. Since it is actually consisted of two  
375 different elements, the riboswitch and the protein degradation tag, we did not test the robustness of the

376 protein degradation tag alone under various conditions. We hypothesized that proteases in different  
377 bacteria recognized different protein degradation tags, and therefore protein degradation tag was not  
378 universal in a wide range of bacteria. Actually, back in 2014, Cameron et al. developed a degradation  
379 system based on the *Mesoplasma florum* tmRNA system that can function in a wide range of bacteria.  
380 However, this system requires additional expression of the exogenous protease *mf*-Lon, which would  
381 increase the complexity of the system, so we did not adopt this system in this study (Cameron &  
382 Collins, 2014). We believe that any protein degradation tag corresponding to host bacterial protease  
383 can be used in conjunction with the theophylline riboswitch to repress gene expression, if desired.

#### 384 **Future directions**

385 To date, libraries of genetic regulatory elements with different regulatory strengths, such as  
386 promoters, RBS elements, and intrinsic terminators, have been constructed (Chen *et al*, 2013; Mutalik  
387 *et al*, 2013; Zaslaver *et al*, 2006). However, a library of theophylline riboswitches has not been  
388 established. So far, all theophylline riboswitches are derived from the same aptamer, and the  
389 modification of them are limited to the expression platform. Therefore, the screening of the  
390 theophylline riboswitch aptamer is also a very important aspect, and with the development of new  
391 technology after the systematic evolution of ligands by exponential enrichment (SELEX), we believe  
392 that more theophylline aptamers can be screened by new methods to obtain theophylline riboswitch  
393 with better performance. Meanwhile, studying the transportation mechanism of theophylline and  
394 improve its transportation efficiency can significantly improve its regulatory effect. This study thus  
395 represented a crucial step toward harnessing theophylline riboswitches and expanding the synthetic  
396 biology toolbox.

#### 397 **APPENDIX DATA**

398 Appendix Data are available at MSB online.

#### 399 **ACKNOWLEDGEMENTS**

400 This work was supported by the National Natural Science Foundation of China (31971339 and  
401 32171422). And was also supported by the Fundamental Research Funds for the Central Universities  
402 (2662022SKYJ004).

403 **CONFLICT OF INTEREST**

404 None declared.

405 **REFERENCES**

- 406 Ali MK, Li XF, Tang Q, Liu XY, Chen F, Xiao JF, Ali M, Chou SH, He J (2017) Regulation of  
407 inducible potassium transporter KdpFABC by the KdpD/KdpE two-component system in  
408 *Mycobacterium smegmatis*. *Front Microbiol* 8: 570
- 409 Beisel CL, Storz G (2011) The base-pairing RNA Spot 42 participates in a multioutput feedforward  
410 loop to help enact catabolite repression in *Escherichia coli*. *Mol Cell* 41: 286-297
- 411 Bervoets I, Charlier D (2019) Diversity, versatility and complexity of bacterial gene regulation  
412 mechanisms: opportunities and drawbacks for applications in synthetic biology. *FEMS Microbiol Rev*  
413 43: 304-339
- 414 Borujeni AE, Mishler DM, Wang JZ, Huso W, Salis HM (2016) Automated physics-based design of  
415 synthetic riboswitches from diverse RNA aptamers. *Nucleic Acids Res* 44: 1-13
- 416 Breaker RR (2012) Riboswitches and the RNA world. *Cold Spring Harb Perspect Biol* 4: a003566
- 417 Butz M, Neuenschwander M, Kast P, Hilvert D (2011) An N-terminal protein degradation tag enables  
418 robust selection of highly active enzymes. *Biochemistry* 50: 8594-8602
- 419 Cameron DE, Collins JJ (2014) Tunable protein degradation in bacteria. *Nat Biotechnol* 32: 1276-1281
- 420 Canadas IC, Groothuis D, Zygouropoulou M, Rodrigues R, Minton NP (2019) RiboCas: a universal  
421 CRISPR-based editing tool for *clostridium*. *ACS Synth Biol* 8: 1379-1390
- 422 Ceres P, Garst AD, Marcano-Velazquez JG, Batey RT (2013a) Modularity of select riboswitch  
423 expression platforms enables facile engineering of novel genetic regulatory devices. *ACS Synth Biol* 2:  
424 463-472
- 425 Ceres P, Trausch JJ, Batey RT (2013b) Engineering modular 'ON' RNA switches using biological  
426 components. *Nucleic Acids Res* 41: 10449-10461
- 427 Chen YJ, Liu P, Nielsen AAK, Brophy JAN, Clancy K, Peterson T, Voigt CA (2013) Characterization  
428 of 582 natural and synthetic terminators and quantification of their design constraints. *Nat Methods* 10:  
429 659-664



- 430 Cui WJ, Han LC, Cheng JT, Liu ZM, Zhou L, Guo JL, Zhou ZM (2016) Engineering an inducible gene  
431 expression system for *Bacillus subtilis* from a strong constitutive promoter and a theophylline-activated  
432 synthetic riboswitch. *Microbial Cell Factories* 15: 199
- 433 Desai SK, Gallivan JP (2004) Genetic screens and selections for small molecules based on a synthetic  
434 riboswitch that activates protein translation. *J Am Chem Soc* 126: 13247-13254
- 435 Fowler CC, Brown ED, Li Y (2008) A FACS-based approach to engineering artificial riboswitches.  
436 *Chembiochem* 9: 1906-1911
- 437 Fuertig B, Oberhauser EM, Zetzsche H, Klotzner DP, Heckel A, Schwalbe H (2020) Refolding through  
438 a linear transition state enables fast temperature adaptation of a translational riboswitch. *Biochemistry*  
439 59: 1081-1086
- 440 Gruber AR, Lorenz R, Bernhart SH, Neubock R, Hofacker IL (2008) The Vienna RNA websuite.  
441 *Nucleic Acids Res* 36: W70-74
- 442 Guillier M, Gottesman S (2006) Remodelling of the *Escherichia coli* outer membrane by two small  
443 regulatory RNAs. *Mol Microbiol* 59: 231-247
- 444 Harbaugh SV, Silverman AD, Chushak YG, Zimlich K, Wolfe M, Thavarajah W, Jewett MC, Lucks  
445 JB, Chávez JL (2022) Engineering a synthetic dopamine-responsive riboswitch for *in vitro* biosensing.  
446 *ACS Synth Biol* Epub ahead of print.
- 447 He J, Shao XH, Zheng HJ, Li MS, Wang JP, Zhang QY, Li L, Liu ZD, Sun M, Wang SY *et al* (2010)  
448 Complete genome sequence of *Bacillus thuringiensis* mutant strain BMB171. *J Bacteriol* 192:  
449 4074-4075
- 450 Hillen W, Berens C (1994) Mechanisms underlying expression of Tn10 encoded tetracycline  
451 resistance. *Annu Rev Microbiol* 48: 345-369
- 452 Hoskins JR, Singh SK, Maurizi MR, Wickner S (2000) Protein binding and unfolding by the chaperone  
453 ClpA and degradation by the protease ClpAP. *P Natl Acad Sci USA* 97: 8892-8897
- 454 Jang S, Jang S, Im DK, Kang TJ, Oh MK, Jung GY (2019) Artificial caprolactam-specific riboswitch  
455 as an intracellular metabolite sensor. *ACS Synth Biol* 8: 1276-1283
- 456 Jang S, Jang S, Xiu Y, Kang TJ, Lee SH, Koffas MAG, Jung GY (2017) Development of artificial  
457 riboswitches for monitoring of naringenin *in vivo*. *ACS Synth Biol* 6: 2077-2085

458 Kato Y (2020) Extremely low leakage expression systems using dual transcriptional-translational  
459 control for toxic protein production. *Int J Mol Sci* 21: 705

460 Koch AL (1956) The metabolism of methylpurines by *Escherichia coli*. I. Tracer studies. *J Biol Chem*  
461 219: 181-188

462 Li XF, Chen F, Liu XY, Xiao JF, Andongma BT, Tang Q, Cao XJ, Chou SH, Galperin MY, He J  
463 (2022) Clp protease and antisense RNA jointly regulate the global regulator CarD to mediate  
464 mycobacterial starvation response. *eLife* 11: e73347

465 Li XF, Mei H, Chen F, Tang Q, Yu ZQ, Cao XJ, Andongma BT, Chou SH, He J (2017) Transcriptome  
466 landscape of *Mycobacterium smegmatis*. *Front Microbiol* 8: 2505

467 Lynch SA, Gallivan JP (2009) A flow cytometry-based screen for synthetic riboswitches. *Nucleic Acids*  
468 *Res* 37: 184-192

469 Mitra A, Angamuthu K, Jayashree HV, Nagaraja V (2009) Occurrence, divergence and evolution of  
470 intrinsic terminators across eubacteria. *Genomics* 94: 110-116

471 Mutalik VK, Guimaraes JC, Cambray G, Lam C, Christoffersen MJ, Mai QA, Tran AB, Paull M,  
472 Keasling JD, Arkin AP *et al* (2013) Precise and reliable gene expression via standard transcription and  
473 translation initiation elements. *Nat Methods* 10: 354-360

474 Ogawa A, Maeda M (2008) An artificial aptazyme-based riboswitch and its cascading system in *E.*  
475 *coli*. *Chembiochem* 9: 206-209

476 Page K, Shaffer J, Lin S, Zhang M, Liu JM (2018) Engineering riboswitches *in vivo* using dual genetic  
477 selection and fluorescence-activated cell sorting. *ACS Synth Biol* 7: 2000-2006

478 Proshkin S, Mironov A, Nudler E (2014) Riboswitches in regulation of Rho-dependent transcription  
479 termination. *Biochim Biophys Acta* 1839: 974-977

480 Qi LS, Larson MH, Gilbert LA, Doudna JA, Weissman JS, Arkin AP, Lim WA (2013) Repurposing  
481 CRISPR as an RNA-guided platform for sequence-specific control of gene expression. *Cell* 152:  
482 1173-1183

483 Quand EM, Hammerling MJ, Summers RM, Otoupal PB, Slater B, Alnahhas RN, Dasgupta A,  
484 Bachman JL, Subramanian MV, Barrick JE (2013) Decaffeination and measurement of caffeine

485 content by addicted *Escherichia coli* with a refactored N-demethylation operon from *Pseudomonas*  
486 *putida* CBB5. *ACS Synth Biol* 2: 301-307

487 Rafique N, Bashir S, Khan MZ, Hayat I, Orts W, Wong DWS (2021) Metabolic engineering of  
488 *Bacillus subtilis* with an endopolygalacturonase gene isolated from *Pectobacterium. carotovorum*; a  
489 plant pathogenic bacterial strain. *PLoS One* 16: e0256562

490 Richardson EJ, Limaye B, Inamdar H, Datta A, Manjari KS, Pullinger GD, Thomson NR, Joshi RR,  
491 Watson M, Stevens MP (2011) Genome sequences of *Salmonella enterica* Serovar Typhimurium,  
492 *Choleraesuis*, *Dublin*, and *Gallinarum* strains of well-defined virulence in food-producing animals. *J*  
493 *Bacteriol* 193: 3162-3163

494 Rogers JK, Guzman CD, Taylor ND, Raman S, Anderson K, Church GM (2015) Synthetic biosensors  
495 for precise gene control and real-time monitoring of metabolites. *Nucleic Acids Res* 43: 7648-7660

496 Rosenberg M, Court D (1979) Regulatory sequences involved in the promotion and termination of  
497 RNA-transcription. *Annu Rev Genet* 13: 319-353

498 Snoek T, Chaberski EK, Ambri F, Kol S, Bjorn SP, Pang B, Barajas JF, Welner DH, Jensen MK,  
499 Keasling JD (2020) Evolution-guided engineering of small-molecule biosensors. *Nucleic Acids Res* 48:  
500 e3

501 Sudarsan N, Hammond MC, Block KF, Welz R, Barrick JE, Roth A, Breaker RR (2006) Tandem  
502 riboswitch architectures exhibit complex gene control functions. *Science* 314: 300-304

503 Suess B, Fink B, Berens C, Stentz R, Hillen W (2004) A theophylline responsive riboswitch based on  
504 helix slipping controls gene expression *in vivo*. *Nucleic Acids Res* 32: 1610-1614

505 Suess B, Hanson S, Berens C, Fink B, Schroeder R, Hillen W (2003) Conditional gene expression by  
506 controlling translation with tetracycline-binding aptamers. *Nucleic Acids Res* 31: 1853-1858

507 Topp S, Gallivan JP (2008) Riboswitches in unexpected places--a synthetic riboswitch in a protein  
508 coding region. *RNA* 14: 2498-2503

509 Topp S, Reynoso CMK, Seeliger JC, Goldlust IS, Desai SK, Murat D, Shen A, Puri AW, Komeili A,  
510 Bertozzi CR *et al* (2011) Synthetic riboswitches that induce gene expression in diverse bacterial  
511 species. *Appl Environ Microb* 77: 2199-2199

512 Tribe DE (1987) Novel microorganism and method. United States Patent 4681852, 4, 681-852.

- 513 Wachsmuth M, Findeiss S, Weissheimer N, Stadler PF, Morl M (2013) *De novo* design of a synthetic  
514 riboswitch that regulates transcription termination. *Nucleic Acids Res* 41: 2541-2551
- 515 Wang X, Cai X, Ma HD, Yin W, Zhu L, Li XF, Lim HM, Chou SH, He J (2019) A c-di-AMP  
516 riboswitch controlling *kdpFABC* operon transcription regulates the potassium transporter system in  
517 *Bacillus thuringiensis*. *Commun Biol* 2: 151
- 518 Wang X, Ji SC, Yun SH, Jeon HJ, Kim SW, Lim HM (2014) Expression of each cistron in the *gal*  
519 operon can be regulated by transcription termination and generation of a *galK*-specific mRNA, mK2. *J*  
520 *Bacteriol* 196: 2598-2606
- 521 Winkler W, Nahvi A, Breaker RR (2002) Thiamine derivatives bind messenger RNAs directly to  
522 regulate bacterial gene expression. *Nature* 419: 952-956
- 523 Wrist A, Sun WQ, Summers RM (2020) The theophylline aptamer: 25 years as an important tool in  
524 cellular engineering research. *ACS Synth Biol* 9: 682-697
- 525 Wu L, Liu Z, Liu Y (2021) Thermal adaptation of structural dynamics and regulatory function of  
526 adenine riboswitch. *RNA Biol* 18: 2007-2015
- 527 Yu CL, Louie TM, Summers R, Kale Y, Gopishetty S, Subramanian M (2009) Two distinct pathways  
528 for metabolism of theophylline and caffeine are coexpressed in *Pseudomonas putida* CBB5. *J Bacteriol*  
529 191: 4624-4632
- 530 Zaslaver A, Bren A, Ronen M, Itzkovitz S, Kikoin I, Shavit S, Liebermeister W, Surette MG, Alon U  
531 (2006) A comprehensive library of fluorescent transcriptional reporters for *Escherichia coli*. *Nat*  
532 *Methods* 3: 623-628
- 533 Zhou H, Zheng C, Su JM, Chen B, Fu Y, Xie YQ, Tang Q, Chou SH, He J (2016) Characterization of a  
534 natural triple-tandem c-di-GMP riboswitch and application of the riboswitch-based dual-fluorescence  
535 reporter. *Sci Rep* 6: 20871
- 536 Zhou YN, Gottesman S (1998) Regulation of proteolysis of the stationary-phase sigma factor RpoS. *J*  
537 *Bacteriol* 180: 1154-1158

538

539 **FIGURE LEGENDS**

540 **Figure 1 - Evaluation of gene expression regulation efficiencies of various theophylline**  
541 **riboswitches.**

542 A Designed plasmids containing gene circuits to assess the repression profile of theophylline  
543 riboswitches. The *turborfp* gene (shown as red arrow) is controlled by a constitutive promoter (shown  
544 as black arrow). Also shown are the theophylline riboswitch coding sequence (blue box) and RBS  
545 coding sequence (black semicircle). Control plasmid pWA143, including the gene circuit without the  
546 riboswitch coding sequence.

547 B Definition of activation/repression ratio, basal expression level, and dynamic range. The  
548 activation/repression ratio is calculated by dividing the maximum value with the minimum value. Basal  
549 expression level refers to the output signal prior to addition of the inducer. In the case of activation, the  
550 minimum value is equal to the basal expression level; in the case of repression, the maximum value is  
551 equal to the basal expression level. Dynamic range refers to the maximum and minimum values of the  
552 interval.

553 C Relative expression levels of TurboRFP fluorescence intensity measured in the absence (light blue)  
554 and presence (dark blue) of 2 mM theophylline.

555 The numbers above the column represent activation/repression ratios. Data represent mean  $\pm$  SD of 3  
556 biological replicates.

557 **Figure 2 - Evaluation of gene expression regulation efficiencies of rationally designed TC-OFF**  
558 **theophylline riboswitches.**

559 A Design strategy for theophylline-dependent riboswitch R1 to control transcription. Theophylline  
560 aptamer (red) was fused to an intrinsic transcription terminator (cyan and yellow). Sequences modified  
561 from the previous riboswitch B were marked in yellow. The RBS sequence (black semicircle) and the  
562 open reading frame of the reporter gene *turborfp* are located downstream of this construct. In the  
563 absence of theophylline, intrinsic terminator formation is inhibited, resulting in transcription  
564 readthrough and *turborfp* expression. Upon binding of theophylline (black solid circle), an intrinsic  
565 terminator is formed and transcription is prematurely stopped, resulting in repression of *turborfp*  
566 expression.

567 B Relative expression levels of *turboRFP* mRNA measured in the absence (white and light blue) and  
568 presence (gray and dark blue) of 2 mM theophylline.

569 C Relative TurboRFP fluorescence intensities measured in the absence (white and light blue) and  
570 presence (gray and dark blue) of 2 mM theophylline.

571 The numbers above the column represent activation/repression ratios. Data represent mean  $\pm$  SD of 3  
572 biological replicates.

573 **Figure 3 - Evaluation of gene expression regulation efficiencies of tandem TC-OFF theophylline**  
574 **riboswitches at different theophylline concentrations.**

575 A Schematic of plasmids containing engineered gene circuit controlled by tandem theophylline  
576 riboswitches. Promoter (black arrow), riboswitch coding sequences (blue box), linker coding sequences  
577 (brown box), RBS coding sequences (black semicircle) and *turboRFP* (red arrow) are indicated. R1  
578 represents one riboswitch, R2 represents two riboswitches in tandem, and R3 represents three  
579 riboswitches in tandem.

580 B Relative TurboRFP fluorescence measured in each strain harboring different plasmids with tandem  
581 riboswitch (R1, R2 and R3) in the absence and presence of 2 mM theophylline.

582 C Relative TurboRFP fluorescence of each strain grown in LB medium supplemented with different  
583 concentrations of theophylline.

584 The numbers above the column represent activation/repression ratios. Data represent mean  $\pm$  SD of 3  
585 biological replicates.

586 **Figure 4 - Comparison of experimental measurements and model predictions.**

587 A Relative TurboRFP fluorescence measured in strain harboring pWA140 (R2) at various theophylline  
588 concentrations from 0 to 2.0 mM over 2 to 24 hours. Data represent mean  $\pm$  SD of 3 biological  
589 replicates. B Mathematic model of R2 based on all data measured at different theophylline  
590 concentrations and growth times.

591 Data represent mean  $\pm$  SD of 3 biological replicates.

592 **Figure 5 - Evaluation of gene expression regulation efficiencies of tandem TC-OFF theophylline**  
593 **riboswitches at different conditions.**

594 A Regulation of TurboRFP expression by R2 in different bacterial strains.

595 B Regulation of TurboRFP expression by R2 in different *E. coli* strains.

596 C Regulation of TurboRFP expression by R2 in *E. coli* JM101 strain grown at different temperatures.

597 D Regulation of TurboRFP expression by R2 in *E. coli* JM101 strain grown in different growth media.

598 The numbers above the column represent activation/repression ratios. Data represent mean  $\pm$  SD of 3

599 biological replicates.

600 **Figure 6 - Regulation of TurboRFP expression by the R2-RepA system.**

601 A Schematic of plasmids containing the theophylline riboswitch coding sequences or RepA  
602 degradation tag coding sequences upstream of *turborfp*. pWA143 was used as a control plasmid  
603 without regulatory sequences upstream of *turborfp*. pWA140, pWA144 and pWA146 represent  
604 plasmids containing tandem riboswitch coding sequences, RepA tag coding sequences, and plasmids  
605 containing these two sequences, respectively.

606 B Regulation of TurboRFP expression by protein degradation tag-RepA at different growth phases.

607 The numbers above the column represent the TurboRFP fluorescence intensity of “no riboswitch”  
608 divided by “RepA” TurboRFP fluorescence intensity.

609 C Regulation of TurboRFP expression by R2 at 0 or 2.0 mM theophylline over 2 to 12 hours. The  
610 numbers above the column represent the TurboRFP fluorescence intensity at 0 mM theophylline  
611 divided by TurboRFP fluorescence intensity at 2 mM theophylline.

612 D Regulation of TurboRFP expression by R2-RepA system at 0 or 2.0 mM theophylline over 2 to 12  
613 hours. The numbers above the column represent the TurboRFP fluorescence intensity of “no  
614 riboswitch” divided by TurboRFP fluorescence intensity at 0 mM or 2 mM theophylline, respectively.

615 All data above represent mean  $\pm$  SD of 3 biological replicates.

616

617

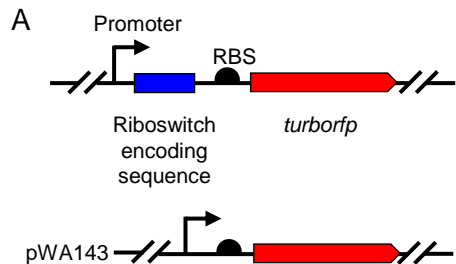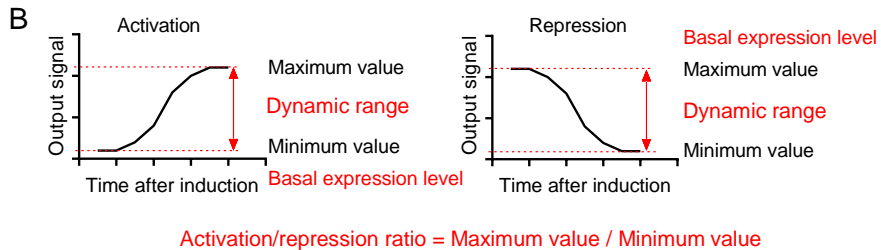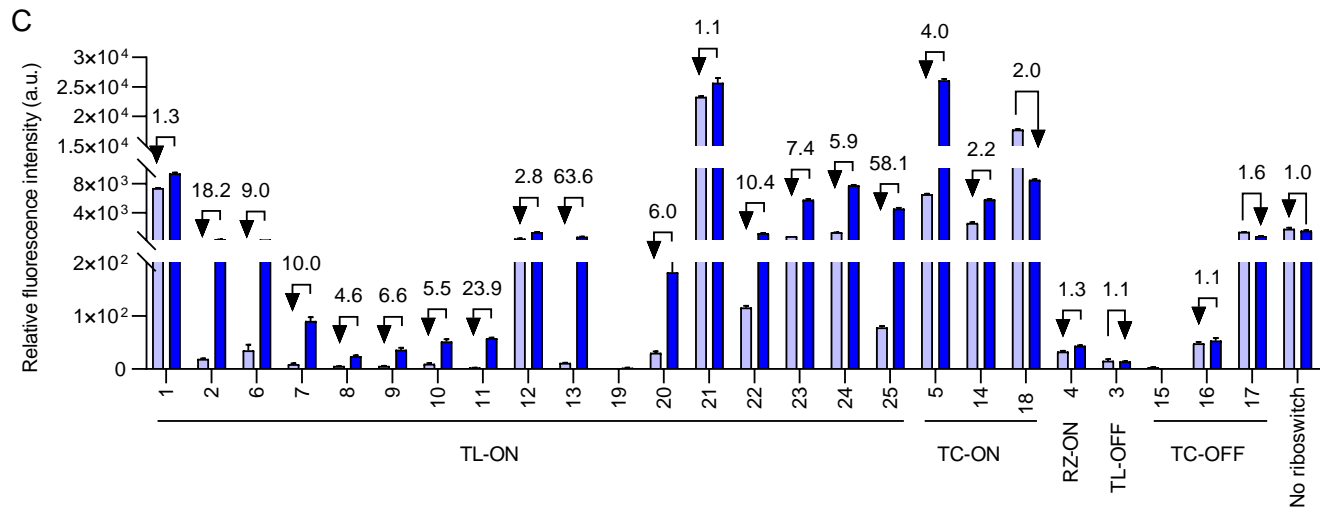



A

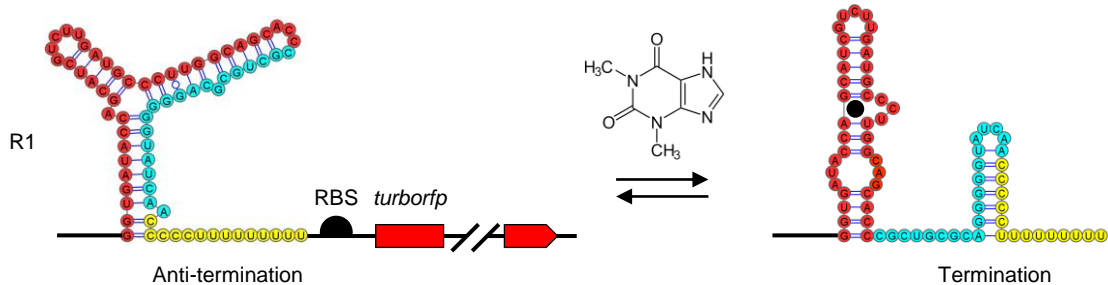

B

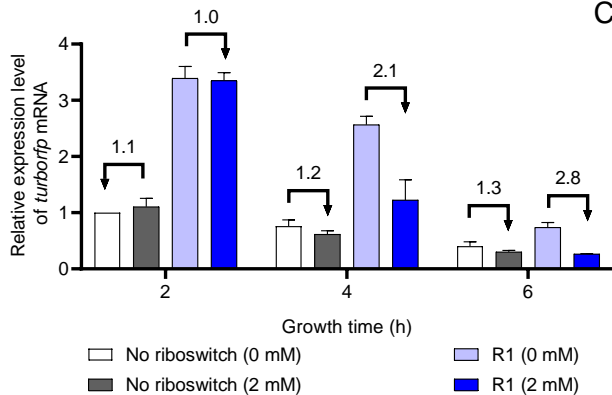

C

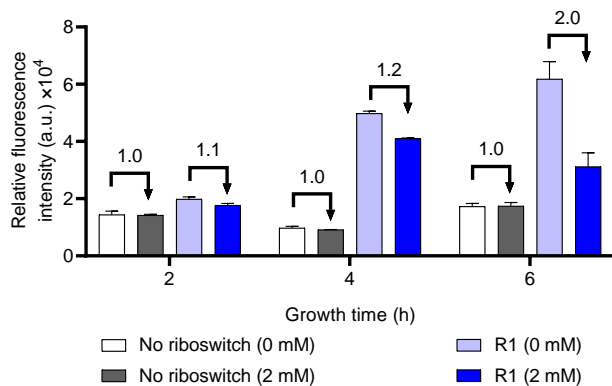

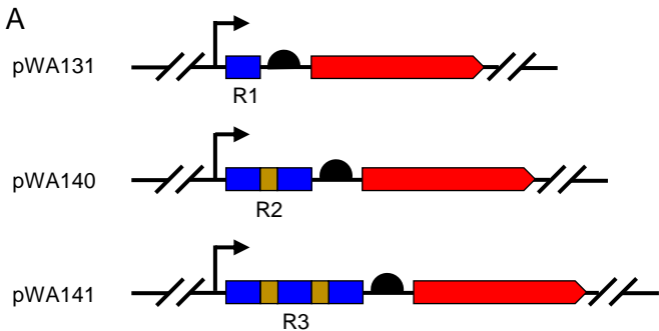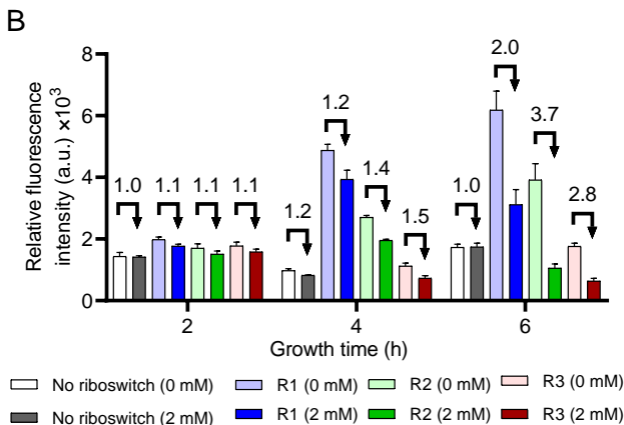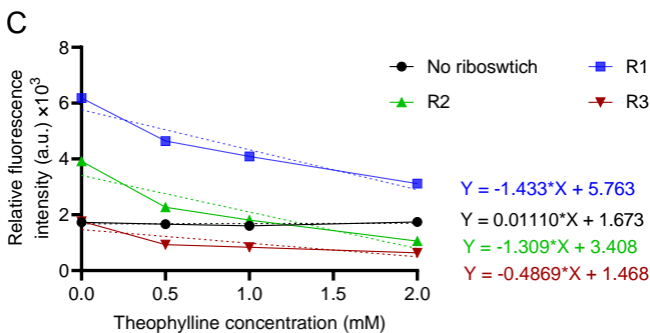

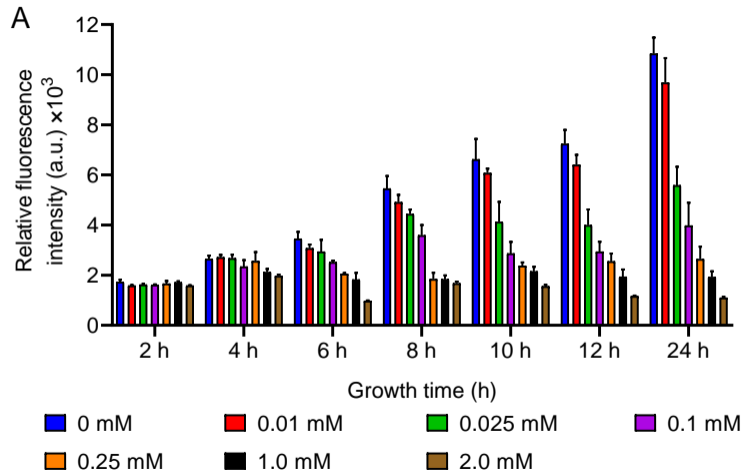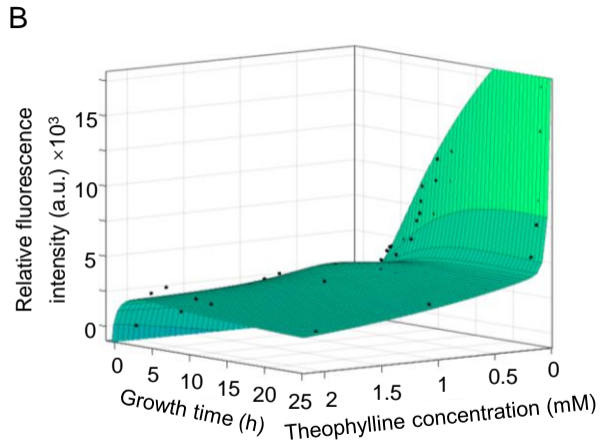

A

Different bacterial strains

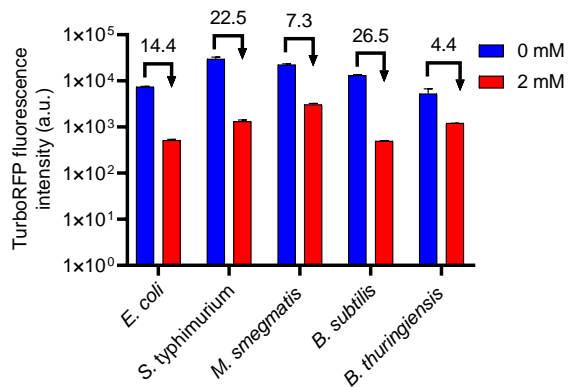

B

Different *E. coli* strains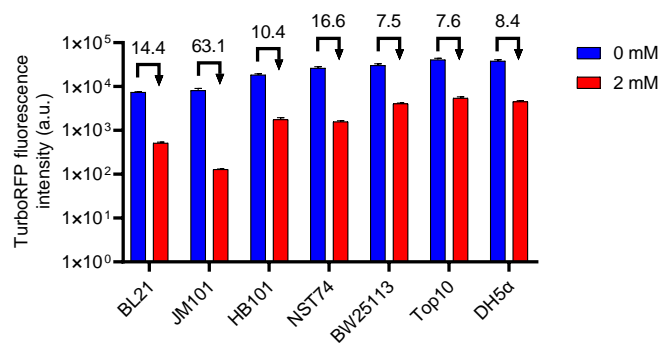

C

*E. coli* JM101 at different temperature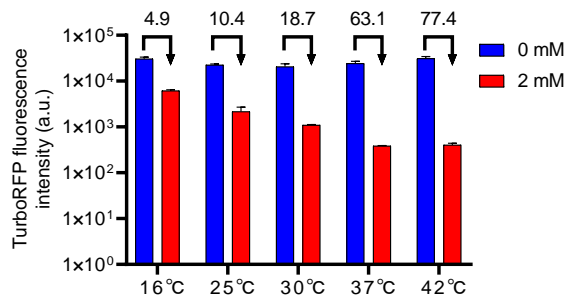

D

*E. coli* JM101 in different media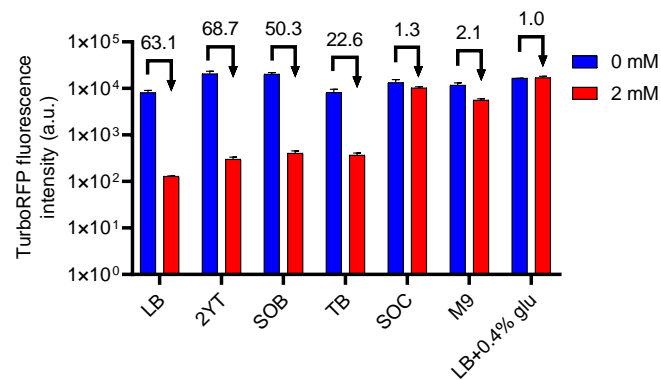

A

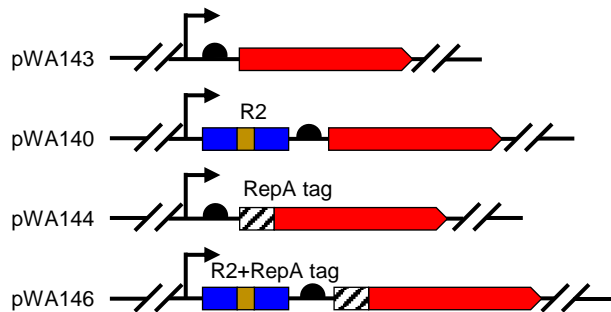

B

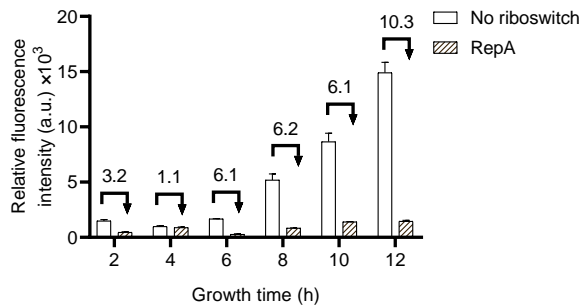

C

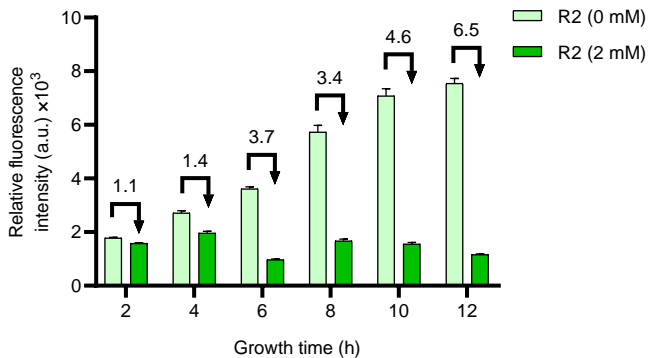

D

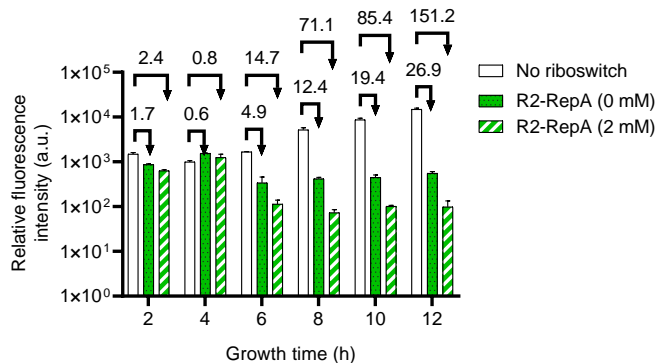

**Table 1. A list of theophylline riboswitches used in bacteria published to date.**

| Number | Sequence*                                                                                                                                          | Regulatory mechanism | Strain                            | Reference                           |
|--------|----------------------------------------------------------------------------------------------------------------------------------------------------|----------------------|-----------------------------------|-------------------------------------|
| 1      | UAUGUUGAUACUUAUUUUAAAGAUUAAACAAAAGAUGAUACCA<br>GCCGAAAGGCCUUGGCAGCUCUCGUGGAGUGGAUGAAGUG                                                            | TL-ON                | <i>Bacillus subtilis</i><br>WH335 | (Suess <i>et al.</i> , 2004)        |
| 2      | CCCUGUACCGGUGAUACCAGCAUCGUCUUGAUGCCUUGGCAG<br>CACCUAUAAAGACAACAAGAUGUGCGAACUCG                                                                     | TL-ON                | <i>Escherichia coli</i><br>TOP10  | (Desai & Gallivan,<br>2004)         |
| 3      | AUAGGUACCUA AUGCAACCUGAUACCAGCAUCGUCUUGAUGCC<br>CUUGGCAGCAGGCAACAAG                                                                                | TL-OFF               | <i>E. coli</i> TOP10              | (Topp & Gallivan,<br>2008)          |
| 4      | GGGAGACCACAACGGUUUCCCUAUCACCUUUUUGUAGGUUGCC<br>CGAAAGGGCGACCCUGAUGAGCCUGGAUACCAGCCGAAAGGCC<br>CUUGGCAGUUAGACGAAACAAGAAGGAGAUUACCAUG                | RZ-ON                | <i>E. coli</i> BL21 (DE3)         | (Ogawa & Maeda,<br>2008)            |
| 5      | CAGGUGAUACCAGCAUCGUCUUGAUGCCUUGGCAGCACCTATA<br>TAAGAAGAAGGGUACCUUAAACCCUUCUUCUUAUGAAGAAGG<br>GGUUUUUAUUUU                                          | TC-ON                | <i>E. coli</i> DH5a               | (Fowler <i>et al.</i> ,<br>2008)    |
| 6      | GGUGAUACCAGCAUCGUCUUGAUGCCUUGGCAGCACCCCGCU<br>GCAGGACAACAAGAUG                                                                                     | TL-ON                | <i>E. coli</i> TOP10              | (Lynch &<br>Gallivan, 2009)         |
| 7      | GGUGAUACCAGCAUCGUCUUGAUGCCUUGGCAGCACCCUGCU<br>AAGGUAACAACAAGAUG                                                                                    |                      |                                   |                                     |
| 8      | GGUACCGGUGAUACCAGCAUCGUCUUGAUGCCUUGGCAGCAC<br>CCUGAGAAGGGGCAACAAGAUG                                                                               | TL-ON                | Various bacterial<br>strains      | (Topp <i>et al.</i> , 2011)         |
| 9      | GGUACCGGUGAUACCAGCAUCGUCUUGAUGCCUUGGCAGCAC<br>CCGUGCGCAGGGGGUAUCAACAAGAUG                                                                          |                      |                                   |                                     |
| 10     | GGUACCGGUGAUACCAGCAUCGUCUUGAUGCCUUGGCAGCAC<br>CCUUGGCAGCACCAAGACAACAAGAUG                                                                          |                      |                                   |                                     |
| 11     | GGUACCGGUGAUACCAGCAUCGUCUUGAUGCCUUGGCAGCAC<br>CCUGCUAAGGUAACAACAAGAUG                                                                              |                      |                                   |                                     |
| 12     | GGUACCGGUGAUACCAGCAUCGUCUUGAUGCCUUGGCAGCAC<br>CCUGCUAAGGAGGUAACAACAAGAUG                                                                           |                      |                                   |                                     |
| 13     | GGUACCGGUGAUACCAGCAUCGUCUUGAUGCCUUGGCAGCAC<br>CCUGCUAAGGAGGCAACAAGAUG                                                                              |                      |                                   |                                     |
| 14     | AAGUGAUACCAGCAUCGUCUUGAUGCCUUGGCAGCACUUCAG<br>AAAUCUCUGAAGUGCUGUUUUUUUAGGAGGUUAUGAUG                                                               | TC-ON                | <i>E. coli</i> TOP10              | (Wachsmuth <i>et al.</i> ,<br>2013) |
| 15     | AAUUUCAUAGUUAGAUCGUGUUAUUGGUGAAGAUAAUACCAG<br>CUUCGAAAGAAGCCUUGGCAGUAUCUCGUUGUUAUAAUCAU<br>UUAUGAUGAUAAUUGAU AAGCAAUGAGAGUAUCCUCUCAUU<br>GCUUUUUUU | TC-OFF               | <i>E. coli</i> BW25113<br>(Dnep)  | (Ceres <i>et al.</i> ,<br>2013a)    |

|    |                                                                                                                                                                                |       |                                  |                                    |
|----|--------------------------------------------------------------------------------------------------------------------------------------------------------------------------------|-------|----------------------------------|------------------------------------|
| 16 | CUUCCUGACACGAAAAUUUCAU <u>UCCGUUCUAAUACCAGCUU</u><br>CGAAAGAAGCCCUUGGCAGUAAGAAGAGACAAAUCACUGACA<br><u>AAGUCUUCUUCUUAAGAGGACUUUUUU</u>                                          |       |                                  |                                    |
| 17 | CAAAAAUUAAUAACAUUUUCUCUU <u>AUACCAGCUUCGAAAGAA</u><br>GCCCUUGGCAGGAGAGAGGCAGUGUUUUACGUAGAAAAGCCUC<br><u>UUUCUCUCAUGGAAAGAGGCUUUUU</u>                                          |       |                                  |                                    |
| 18 | AAUUAAUAGCUAAUAUCACGAUUUU <u>AUACCAGCUUCGAAAGA</u><br>AGCCCUUGGCAG <u>AAAAUCCUGAUUACAAAAUUUGUUUAUGACA</u><br><u>UUUUUUUGUAAUCAGGAUUUUUUUATTATCAAACATTTAAGT</u><br>AAAGGAGTTTGT | TC-ON | <i>E. coli</i> BW25113<br>(Dnep) | (Ceres <i>et al.</i> ,<br>2013b)   |
| 19 | AUACGACUCACUAUAGGUG <u>AUACCAGCAUCGUCUUGAUGCCCU</u><br>UGGCAGCACCCUGCUAAAGGAGUAACAACAAGAUG                                                                                     | TL-ON | <i>B. subtilis</i>               | (Cui <i>et al.</i> , 2016)         |
| 20 | AACGGACUCACUAUAGGUACCGUG <u>AUACCAGCAUCGUCUUG</u><br>AUGCCCUUGGCAGCACCCUGCGGGCCGGCAACAAGAUG                                                                                    | TL-ON | <i>E. coli</i> DH10B             | (Borujeni <i>et al.</i> ,<br>2016) |
| 21 | CACUGUUCGUAAGAAAGCAUCAUUGUGACUGUGUAGAUUGCU<br>AUUACAAGAAGAUCAAGGAGCAAACUAUG                                                                                                    | TL-ON | <i>E. coli</i>                   | (Page <i>et al.</i> , 2018)        |
| 22 | GGUGAUACCAGCAUCGUCUUGAUGCCCUUGGCAGCACCCUGCU<br>AAGGAGGUACAACAUG                                                                                                                |       |                                  |                                    |
| 23 | GGUGAUACCAGCAUCGUCUUGAUGCCCUUGGCAGCACCCUGCU<br>AAGGAGGUACUUAUG                                                                                                                 | TL-ON | <i>Clostridium</i>               | (Canadas <i>et al.</i> ,<br>2019)  |
| 24 | GGUGAUACCAGCAUCGUCUUGAUGCCCUUGGCAGCACCCUGCU<br>AAGGAGGUGUGUUAUG                                                                                                                |       |                                  |                                    |
| 25 | GGUGAUACCAGCAUCGUCUUGAUGCCCUUGGCAGCACCCUGCU<br>AAGGAGGUACAACAUG                                                                                                                |       |                                  |                                    |

\* Theophylline aptamers are marked in green. Translation start site and RBS are marked in red. Ribozyme cleavage sites are marked in blue.

Intrinsic terminators are marked in purple, while the hairpin sequences are underlined.
